# Supplementary material for: Integrative Analysis of Metabolomic, Proteomic and Genomic Data to Reveal Functional Pathways and Candidate Genes for Drip Loss in Pigs
Source: Int J Mol Sci. 2016 Aug 30;17(9):1426. doi: 10.3390/ijms17091426 (PMC5037705; doi:10.3390/ijms17091426)
Supplement: Supplementary file 1 [file ijms-17-01426-s001.zip › ijms-140271-supple-final-Table .xlsx]

## Sheet: Table S1
ID;drip_loss;slaughter_weight;season;Adenosine-5-monophosphate;Glutamic acid;Glucose;Fructose-6-phosphate;Urea;Glycerol-3-phosphate;Fructose;beta-Alanine;Uracil;Ribose-5-phosphate;Fumaric acid;Alanine;myo-Inositol;Guanosine-5-monophosphate;Citric acid;Agmatine [-NH3];Valine;Lactic acid;Cholesterol;Threonine;Gluconic acid;Galactonic acid;Inosine;Ethanolaminephosphate;Isocitric acid;Malic acid;Seri…	5'-cyclic monophosphate (cAMP);Pyruvic acid;2-Ketoglutaric Acid;UDP-glucose;5'-guanylate diphosphate (guanosine diphosphate);Glycine;Succinic acid;Lysine;phosphoenol pyruvate;Uridine triphosphate (UTP);Tyrosine;Glyceryl phosphate;GDP-D-mannose;dihydroxyacetone phosphate (DHAP);Glutathione	oxidized;Inosine 5'-monophosphate (IMP);Acetoacetic acid;Acetoacetic acid.1;Uridine diphosphate glucuronic acid;Hydroxypyruvic acid;5'-Methylthioadenosine;Benzoic acid;Glycogen;Dihydroxyacetone (glycerone);Ceramide (d18:1/20:0);Ceramide (d18:1/24:1(15Z));D-Glycerate 3-phosphate;UDP-N-acetyl-D-galactosamine;Oxalic Acid;Taurine;Hypoxanthine;Homoserine;N-Acetyl-b-neuraminic acid;D-Sedoheptulose 7-ph…	7-bisphosphate;Methylglyoxal;D-Ribose 1-phosphate;D-Glucose 1	6-biphosphate;Diaminopimelic acid;3-Methyl-2-oxovaleric acid;Diacetyl;Diacetyl.1;Creatinine;Chlorogenic acid;Homocarnosine;Cyclic CMP;3-Dehydroquinic acid;L-2-Aminoadipic acid;O-Acetylserine;Phosphoglycolic acid;Dimethylglycine;S-Acetyldihydrolipoamide;Glucosylceramide (d18:1/24:1(15Z));Glycerylphosphorylethanolamine;D-Glucono-1	5-lactone 6-phosphate;Allose;Allantoin;Maltotriose;FMNH;Pseudouridine;Glutaconic acid;2-Hydroxyadipic acid;1-Methyladenosine;N1-(5-Phospho-D-ribosyl)-AMP;(S)-2-Hydroxyglutarate;3-Demethylubiquinone-9;N2-Succinyl-L-ornithine;Inositol cyclic phosphate;Ganglioside GM3 (d18:1/18:0);Ganglioside GM3 (d18:1/20:0);Ganglioside GM3 (d18:1/22:0);Ganglioside GM3 (d18:1/24:1(15Z));2-Hydroxyethanesulfonate;Hom…
1;3.1;88.2;2002.S;0.001588242;0.028830234;0.004172907;0.001405593;0.098408308;0.030302205;0.00551284;0.009441687;0.000944805;0.000535341;0.001763762;0.171480988;0.132577488;0.000816265;0.000650983;0.00036142;0.011311197;0.459197002;0.034860149;0.002250306;0.000245688;0.000338144;0.007858454;0.00088286;0.000114553;0.004677223;0.003237746;0.000771977;0.000459695;0.000355601;0.002253385;0.000146262;…
2;0.8;80.6;2003.W;0.004041088;0.016620431;0.000468786;0.000682178;0.139164733;0.025083477;0.001316386;0.007051569;0.000523258;0.000667225;0.001659106;0.159267202;0.204121225;0.000477454;0.001245532;0.000205793;0.011643744;0.245529892;0.037009155;0.001995621;0.000159863;0.000497036;0.001181351;0.000816407;0.000143363;0.003503426;0.003052465;0.000579638;0.000502733;0.000694284;0.001848064;3.19E-05;…
3;2.9;83.4;2004.W;0.006584643;0.034058084;0.016570845;0.017743756;0.114981913;0.06809174;0.004024736;0.022724185;0.001120637;0.000776833;0.004690958;0.252848492;0.106531219;0.001939311;0.000775866;0.000186797;0.018170425;0.543028869;0.038638608;0.003613732;0.000350696;0.000709345;0.013763902;0.001012317;0.000134494;0.008608651;0.007904427;0.002323751;0.000866014;0.000784064;0.001874987;0.00084377…
4;0.6;84.4;2005.W;0.003134218;0.012062306;0.001734784;0.007083648;0.083645169;0.044990275;0.007503699;0.030376561;0.000975995;0.000398454;0.000552949;0.261794537;0.142496132;0.002829297;8.05E-05;0.000350308;0.016182202;0.815440776;0.038265874;0.004530937;0.000249754;0.000323979;0.047682034;0.001027855;7.47E-05;0.000940409;0.006942246;0.001487995;0.000885926;0.000313447;0.001943104;0.000269199;0.0…
5;3.4;78.4;2002.S;0.004524482;0.022133416;0.000274113;0.000613492;0.094765673;0.069997693;0.001293141;0.016189458;0.001146157;0.000472972;0.001302916;0.128280154;0.161095579;0.00811392;0.000979931;0.000382433;0.009347513;0.332247557;0.039361723;0.001857328;0.00018479;0.000352729;0.002834688;0.001164721;8.85E-05;0.004750699;0.002905805;0.00147975;0.000512957;0.000416421;0.002543321;0.000455835;0.0…
6;1.1;88.2;2003.W;0.013423631;0.023710172;0.009777899;0.058017003;0.134728298;0.055026362;0.003655632;0.009510512;0.00069148;0.000852379;0.003640579;0.228032837;0.15778289;0.004208357;0.001339662;7.41E-05;0.013676591;0.515526453;0.047502694;0.002237319;0.000257827;0.000563556;0.002552629;0.00084139;0.000183719;0.006163416;0.00314445;0.000651753;0.000739104;0.000785316;0.001340971;8.03E-05;0.00162…
7;1;82;2002.S;0.001259373;0.023877482;0.001026378;0.00061156;0.08936723;0.015813454;0.000765049;0.0064186;0.000795822;0.000368197;0.001357621;0.103427507;0.124762615;0.000516989;0.000392112;0.000337304;0.008719928;0.216388942;0.034300589;0.001903718;0.000102452;0.000233276;0.004420572;0.001142104;9.85E-05;0.003222844;0.002119329;0.000501227;0.000629213;0.000276778;0.002120451;0.0001508;0.00028371…
8;4.3;86.4;2002.S;0.009438005;0.019320498;0.014876722;0.016221905;0.111333499;0.094338836;0.008620178;0.014007025;0.000346582;0.001061303;0.003392444;0.196485788;0.25168276;0.001236853;0.000976547;0.000145969;0.010948049;0.644852071;0.045340669;0.004998816;0.000574903;0.000546291;0.005331731;0.000834106;0.000167549;0.007198577;0.004246834;0.002076778;0.001226427;0.001329962;0.001628847;2.21E-05;0…
9;3.9;86.2;2004.W;0.003890443;0.017225064;0.003309677;0.007813569;0.127600996;0.057134648;0.00268032;0.016702467;0.000633046;0.000799293;0.002490429;0.195580554;0.155175446;0.002732159;0.000660743;0.000163419;0.017595669;0.454724919;0.033507942;0.00338557;0.000248716;0.000412136;0.010778235;0.001083616;8.24E-05;0.009400827;0.00508373;0.001807179;0.000617539;0.000483083;0.002156154;0.000595758;0.0…
10;1;87.2;2004.W;0.003123454;0.015012939;0.002254191;0.001517768;0.072670305;0.027771535;0.002871794;0.009624065;0.000711656;0.000445567;0.00174147;0.123549968;0.098554792;0.002963309;0.000539095;0.000236855;0.010823366;0.354941034;0.031816991;0.001798707;0.000204976;0.000182561;0.009592025;0.001076933;9.57E-05;0.004860718;0.002898109;0.000798235;0.00051356;0.000466986;0.001987515;0.000321079;0.0…
11;1.8;93.8;2002.S;0.008106355;0.021710006;0.02577616;0.056138558;0.098371669;0.12059999;0.012830471;0.008989544;0.000867265;0.001055893;0.003952403;0.258506076;0.245596206;0.001713031;0.001024761;0.000177542;0.014814185;0.651667121;0.050385438;0.004290117;0.000616847;0.000918382;0.009872155;0.000730183;0.000117495;0.007071758;0.006234524;0.00157942;0.001678459;0.001172608;0.001322811;0.000119877…
12;4.9;83;2002.S;0.002703525;0.03615645;0.034714991;0.012211759;0.115156685;0.074359352;0.010656826;0.012103198;0.000743342;0.000180793;0.001707205;0.277487591;0.214848564;0.000275627;0.000550181;0.000378068;0.016113068;1.040484364;0.039432759;0.003603686;0.00057306;0.000389985;0.015677505;0.001325392;9.84E-05;0.005690878;0.005119769;0.001717405;0.001109353;0.000682094;0.001983407;7.89E-05;0.0088…
13;2.7;85.8;2003.W;0.011433293;0.059630425;0.001902971;0.001789006;0.244494179;0.069591876;0.001482929;0.009843196;0.000827174;0.001270608;0.003372642;0.310106137;0.285146119;0.02110587;0.002233633;0.000219304;0.016761874;0.333413301;0.064623661;0.00517286;0.000327142;0.000852794;0.006777622;0.001133271;0.000305381;0.008973424;0.011302572;0.002337386;0.001444938;0.001100146;0.002429637;0.00027610…
14;0.9;81.4;2002.S;0.010800812;0.019177545;0.018971831;0.014763527;0.120074093;0.102102403;0.007121963;0.016041973;0.000603746;0.000646736;0.002778451;0.334277153;0.162547353;0.001813719;0.0010211;4.23E-05;0.016731958;0.606759479;0.042618711;0.005206174;0.000329984;0.000556765;0.008598099;0.000721889;9.47E-05;0.006004175;0.00626183;0.0017817;0.001372859;0.000576082;0.002274947;0.000200318;0.00482…
15;5;81.2;2005.W;0.005045224;0.008959276;0.009085197;0.025595505;0.106140274;0.087171402;0.009405543;0.017780608;0.000581936;0.00106119;0.001581797;0.249352167;0.092382984;0.011854366;0.000379463;0.000170631;0.015406621;0.864278297;0.035832591;0.005605441;0.000328704;0.000489234;0.010456555;0.000626012;9.14E-05;0.002985885;0.00722245;0.001937279;0.00096509;0.000706823;0.002194949;0.000819799;0.00…
16;4.1;93.8;2003.W;0.003692579;0.012087448;0.018478101;0.009871703;0.099011644;0.092764693;0.01067844;0.025919326;0.000890445;0.001103227;0.001898124;0.177869709;0.1342499;0.003789905;0.000219523;0.000243852;0.011443506;0.753952145;0.042117185;0.002222091;0.000528271;0.000619149;0.041694624;0.000798638;4.12E-05;0.00301614;0.00250271;0.001402582;0.001256881;0.000790026;0.002939546;0.000320645;0.00…
17;0.8;96.4;2005.W;0.000919192;0.001202078;0.001391069;0.000950005;0.032106374;0.018088682;0.001621952;0.026730272;0.000828641;0.000256478;0.00190316;0.251271206;0.178531736;0.000603181;0.000384543;0.000132643;0.017583381;0.384968894;0.030776183;0.001581873;0.000226167;0.000468914;0.003735798;0.000274095;7.98E-05;0.004399565;0.002121028;0.000626667;0.000105959;0.000603371;0.001949737;0.000260105;…
18;0.8;93.4;2005.W;0.001948226;0.019837089;0.00623068;0.008650245;0.131175757;0.073913831;0.003791626;0.022949888;0.001290462;0.001312811;0.001664065;0.298006529;0.163502353;0.001281756;0.000517715;0.000289154;0.020506599;0.733413643;0.039239976;0.00352184;0.000483994;0.000594871;0.006357254;0.000583599;8.30E-05;0.005067969;0.005506647;0.001803658;0.000669633;0.001382052;0.002049498;0.001030328;0…
19;3.6;83.6;2002.S;0.002521612;0.06148729;0.021157862;0.009142765;0.108174456;0.042552018;0.005953613;0.009450919;0.001660155;0.000780318;0.002979073;0.251077882;0.405362937;0.00024971;0.001323169;0.000503003;0.014306029;0.471210961;0.041999885;0.003336002;0.000183332;0.000290591;0.006166472;0.003516594;0.00013929;0.005466862;0.003021634;0.001728049;0.001134548;0.000548309;0.00365259;0.000122659;…
20;0.5;86.6;2002.S;0.007716575;0.028644129;0.001513287;0.001237088;0.199418552;0.114062718;0.00213625;0.031898751;0.000851511;0.001043433;0.002000654;0.324807956;0.177420195;0.011686502;0.00100115;0.000210662;0.016509795;0.460630317;0.04511195;0.005702673;0.000459999;0.000811925;0.003199422;0.001210481;9.38E-05;0.005298437;0.00730074;0.002909488;0.00105221;0.001221453;0.003058741;0.000485577;0.00…
21;4.9;89.4;2002.S;0.006409134;0.024576728;0.018501834;0.010670632;0.134103198;0.114903138;0.00922697;0.021482609;0.001550777;0.001311887;0.003133064;0.264419184;0.244791308;0.006488825;0.001277198;0.00025816;0.017473836;0.510333028;0.061214409;0.004819731;0.00047121;0.000531521;0.003900356;0.001466587;0.00014048;0.007481251;0.004829212;0.000909221;0.001202297;0.001098101;0.005067751;0.000275258;…
22;1.2;88.8;2002.S;0.003895144;0.021787023;0.023211214;0.020975063;0.154268193;0.112494138;0.012025217;0.031795258;0.001321722;0.001353181;0.003628148;0.329195348;0.214857744;0.00272414;0.000657019;0.000471886;0.013316776;0.802257905;0.056559894;0.005007886;0.000627065;0.000754053;0.02395521;0.00123432;0.0001054;0.007641764;0.004428219;0.001207963;0.001584806;0.001004981;0.00388402;6.53E-05;0.009…
23;3.3;81.4;2002.S;0.005487413;0.025063346;0.017377029;0.01796487;0.10530218;0.085240058;0.005093114;0.033233216;0.000690793;0.001554698;0.003053815;0.212455244;0.123239105;0.004294694;0.000853927;0.000259514;0.013031286;0.486727229;0.052308222;0.003415209;0.000378739;0.000596723;0.003307708;0.000681373;0.000120616;0.006789572;0.00302953;0.001143705;0.001608747;0.001154697;0.003764852;0.000254565…
24;3.3;80.6;2002.S;0.001626915;0.024535128;0.034433892;0.02575171;0.068059883;0.084987079;0.008203561;0.030186216;0.00040092;0.000931711;0.002769602;0.189716577;0.125380138;0.00061903;0.000477045;0.000295498;0.010278832;0.790889004;0.046603556;0.001090425;0.000564543;0.000497847;0.003745835;0.000509377;6.17E-05;0.005475639;0.001920131;0.000110898;0.00130227;0.0012878;0.002803893;0.000130782;0.007…
25;1;82.2;2003.W;0.001540546;0.035218581;0.006995664;0.005274226;0.113618025;0.077335312;0.003947224;0.019385846;0.001358442;0.001014091;0.001273309;0.177920362;0.134525914;0.001340273;0.000535274;0.00040078;0.013044904;0.504515739;0.040596734;0.002474022;0.000402032;0.000774524;0.003150918;0.000965026;7.53E-05;0.003835947;0.003009279;0.000379583;0.000919216;0.001014091;0.003778895;0.000319922;0.…
26;1;75.4;2003.W;0.003463997;0.028414376;0.008472843;0.028342123;0.153031958;0.06313053;0.004498649;0.029810046;0.001019168;0.001952129;0.003065898;0.149770701;0.10304515;0.003399287;0.000619795;0.000323679;0.015110354;0.469609042;0.040143375;0.002209113;0.000274717;0.000612951;0.003366998;0.001143858;0.000122008;0.00586284;0.003402067;0.001448385;0.000750574;0.000789215;0.003448718;0.000100571;0…
27;1;82.2;2003.W;0.000920215;0.016178413;0.084111122;0.112088219;0.093776314;0.246469193;0.004348789;0.038409873;0.000893852;0.000297967;0.004746708;0.164635542;0.099017589;0.002971745;0.00068048;0.000403023;0.012496182;1.494808376;0.032145981;0.002517965;0.00043658;0.000661868;0.006462698;0.001585785;0.000114668;0.014600115;0.003507648;0.000510908;0.001435874;0.001395909;0.001312928;7.62E-05;0.0…
28;3.3;91.6;2004.W;0.006089399;0.015547011;0.017241537;0.055532852;0.119866798;0.091547811;0.007415504;0.015914965;0.001471362;0.001394143;0.004146797;0.272431998;0.103961275;0.006027173;0.00076303;0.000197831;0.012617064;0.678902368;0.054237191;0.00333062;0.000452618;0.000522426;0.012589876;0.000873985;0.000116683;0.008748014;0.00447433;0.001600072;0.000575601;0.000553423;0.003003599;0.00073437;…
29;0.9;89.2;2004.W;0.00625299;0.052845526;0.027842754;0.098439475;0.117389318;0.140998818;0.017109601;0.030205984;0.001458909;0.00058681;0.004921064;0.480480339;0.310662588;0.018683724;0.000999153;0.000318584;0.017140229;1.310134957;0.050840543;0.00315613;0.000645175;0.000489675;0.01747597;0.000989254;0.000138011;0.012134584;0.00532881;0.00253624;0.001256636;0.000830594;0.002150953;0.00029277;0.0…
30;1.8;101.8;2005.W;0.007569033;0.014576134;0.010343424;0.007936123;0.206047136;0.087094001;0.007484033;0.025164627;0.000556784;0.000456607;0.001845584;0.215879467;0.083765422;0.017303089;0.000446065;0.000218687;0.019317885;0.848222801;0.044005297;0.003387627;0.000398433;0.000842217;0.006473224;0.000749376;3.40E-05;0.003968204;0.006641019;0.001577347;0.001378368;0.000719696;0.001810379;0.00025286…
31;0.7;92;2005.W;0.010143984;0.015996447;0.000716381;0.010985116;0.122959213;0.052283538;0.001971358;0.048379941;0.000506213;0.001374069;0.001532103;0.402516671;0.099591938;0.021666169;0.000543662;0.000198578;0.014981204;0.530461551;0.052547611;0.007719189;0.000337921;0.000975812;0.006130843;0.001058438;0.000139087;0.002837392;0.011671473;0.004010387;0.001713386;0.000532662;0.001919783;0.00027445…
32;4.8;85.2;2004.W;0.004389576;0.027282542;0.011274142;0.00531495;0.167652849;0.082412564;0.006406693;0.032676434;0.001004301;0.001248176;0.00204641;0.284002111;0.215258619;0.000811237;0.00094097;0.000349375;0.01411052;0.620053646;0.042704759;0.00274162;0.000409589;0.000435836;0.003670419;0.002094704;0.000145793;0.006843572;0.003877082;0.001900001;0.000983719;0.001264939;0.002766954;0.000409148;0…
33;2.6;90.1;2005.W;0.002421676;0.010902603;0.026495231;0.04545589;0.076083391;0.06311512;0.01643172;0.035863365;0.001410045;0.000266009;0.002173817;0.347363994;0.160638899;0.001724967;9.96E-05;0.000297187;0.010159016;1.643542687;0.036463916;0.003787143;0.000891561;0.000530028;0.081940229;0.000497302;5.90E-05;0.00215653;0.005413545;0.001247825;0.001153368;0.000765743;0.001294178;0.000193052;0.0067…
34;0.8;88.6;2005.W;0.005952693;0.024456015;0.009375386;0.016908699;0.130277427;0.109130651;0.003929846;0.035347435;0.001730701;0.001644711;0.003399563;0.329341386;0.195700578;0.007920373;0.000962844;0.000193635;0.021017956;0.534764034;0.046728055;0.00477514;0.000390526;0.000870468;0.004457449;0.000538861;0.00014419;0.009099206;0.006945244;0.001548779;0.000773059;0.001134274;0.002914785;0.00074463…
35;3.7;75.8;2003.W;0.001455689;0.020615393;0.016031485;0.037890053;0.139968176;0.049764991;0.008604221;0.022967279;0.000528461;0.000715166;0.005046779;0.216995169;0.153909616;0.000120796;0.00070066;0.000198989;0.015965335;0.540875612;0.056367877;0.002757534;0.000389925;0.000452012;0.005985677;0.000499292;0.000105729;0.00706145;0.006355137;0.000144636;0.000790762;0.000784267;0.000924536;0.00011590…
36;1.2;89.8;2003.W;0.004618739;0.046845033;0.003037377;0.006679464;0.132144248;0.065111545;0.003017592;0.03540164;0.001129126;0.001501929;0.003446767;0.175149316;0.143473179;0.005835506;0.001220445;0.000447747;0.01646426;0.345881936;0.058114646;0.002773224;0.000306152;0.000444685;0.004978792;0.001050866;0.000176292;0.007922583;0.00403374;0.001201268;0.000779411;0.000871257;0.001893565;0.000360745…
37;0.6;91.3;2005.W;0.002360067;0.016877207;0.009940018;0.007996936;0.05858164;0.094780073;0.007947827;0.018120725;0.001196819;0.00104507;0.002955219;0.301394247;0.135193079;0.001949834;0.000272757;0.000152937;0.010008462;0.818131305;0.034113541;0.002319545;0.000492195;0.000431517;0.015256932;0.000405125;3.86E-05;0.004714738;0.003572094;0.001058988;0.000920554;0.000769873;0.002378949;0.000708518;0…
38;0.6;89.8;2005.W;0.002199287;0.033858524;0.000216497;0.002835134;0.146727926;0.047497338;0.000656955;0.022374147;0.001889156;0.001446533;0.003207379;0.272333766;0.172749893;0.005443385;0.001157409;0.000156444;0.019566448;0.231553267;0.042505762;0.005322926;0.000179668;0.000515015;0.002400255;0.000531604;0.00015772;0.00494228;0.008011857;0.001669885;0.001186729;0.000760272;0.003423913;0.00072593…
39;0.6;75.4;2006.W;0.003101407;0.010497881;0.000778098;0.002012355;0.127059184;0.069543784;0.002317757;0.039738441;0.000541084;0.001127042;0.002307374;0.247603968;0.065995908;0.006834295;0.000402733;0.000150272;0.013221806;0.475199352;0.044783908;0.005166948;0.000283379;0.000442656;0.002511292;0.000656808;0.000126158;0.004257905;0.008927361;0.001995751;0.000918518;0.000807643;0.002593756;0.000426…
40;0.6;89.6;2006.W;0.007207518;0.007802355;0.000915877;0.0044306;0.131508848;0.055289376;0.003223793;0.052724198;0.000545865;0.001017709;0.00125505;0.285799871;0.064749591;0.009134344;0.000372419;0.000191635;0.011002721;0.604483859;0.038866894;0.004225423;0.000377138;0.000574394;0.003496955;0.000774205;8.15E-05;0.003502843;0.008956467;0.001690476;0.000738433;0.000799246;0.00180773;0.001152159;0.0…
41;0.6;90.7;2006.W;0.005587711;0.010087343;0.008903223;0.038628413;0.129274517;0.08081628;0.017276716;0.041888079;0.00085188;0.000507935;0.00121395;0.230313333;0.063339841;0.014305968;0.00021175;0.000224952;0.013156192;1.281623218;0.044574152;0.005563022;0.000854859;0.000660928;0.112054515;0.000722336;0.000124082;0.003304036;0.008343897;0.002369169;0.001823461;0.001022624;0.001554316;8.78E-05;0.0…
42;2.5;84.1;2006.S;0.003374356;0.029918172;0.002643439;0.011198604;0.106136701;0.034541158;0.004056778;0.045018939;0.001861276;0.000853908;0.002755943;0.252720719;0.189257375;0.003046552;0.000818575;0.000393904;0.013661118;0.613344391;0.053706627;0.00363008;0.000279053;0.000509952;0.00988888;0.001949183;0.000143351;0.006143513;0.005804562;0.002021264;0.000728887;0.000498886;0.004017658;0.00113134…
43;3.9;76.25;2007.W;0.002828756;0.032063185;0.005369994;0.025274479;0.105411352;0.05201281;0.002836418;0.042238316;0.001601471;0.001529057;0.005717892;0.35804759;0.112365852;0.00707826;0.00137;0.000183004;0.014697829;0.559671229;0.048072467;0.004056615;0.000246495;0.000465528;0.009744224;0.000650508;0.000209806;0.009989856;0.004978443;0.002402114;0.00103475;0.001102415;0.001620372;0.000381838;0.0…
44;0.7;82.25;2007.W;0.004407696;0.03588201;0.004369732;0.010156682;0.178253992;0.093037462;0.001788752;0.031938101;0.001207283;0.001767787;0.007233347;0.362207434;0.133246256;0.009775149;0.002765301;0.000163672;0.016805337;0.389195205;0.047156753;0.004694935;0.000247821;0.000528464;0.006610534;0.000806243;0.000349592;0.014317115;0.007996683;0.002248584;0.001339553;0.000482865;0.002728564;0.000182…
45;4.3;79.6;2004.W;0.000733261;0.012135842;0.069502784;0.225125171;0.18221775;0.286761046;0.013158244;0.013625668;0.001314386;0.000100241;0.006140113;0.621848793;0.279860694;0.000630881;0.001068311;0.000423814;0.011848626;1.252862279;0.08629361;0.004285192;0.000156122;0.000135383;0.058562632;0.000797509;0.00019376;0.016377048;0.005200446;0.005823805;0.003318312;0.000278254;0.001832866;6.07E-05;0.…
46;0.8;87;2005.W;0.002649732;0.038909858;0.009615886;0.000836145;0.178890646;0.259826442;0.002994051;0.021411874;0.001507771;0.000299321;0.002118346;1.056318794;0.895533762;0.000245958;0.001506387;0.000552231;0.012825279;0.682079206;0.086272079;0.00642986;0.000131904;9.85E-05;0.010506488;0.002095623;0.000115933;0.009572459;0.006261717;0.006323546;0.002310954;0.000414502;0.003071422;0.000118751;0.…
47;0.6;83;2005.W;0.003711668;0.016930686;0.004049924;0.001438452;0.088112955;0.092665854;0.002389107;0.040289992;0.00109912;0.00132878;0.003034111;0.242023503;0.05888823;0.008986663;0.000548979;0.000136821;0.011152072;0.61401835;0.043316629;0.00343647;0.000329232;0.000589731;0.003169938;0.000447523;0.000106871;0.004783223;0.004340729;0.00130314;0.000916378;0.000869837;0.00192131;0.000947189;0.001…
48;4.6;94.05;2005.S;0.007153233;0.020252004;0.002790585;0.005684642;0.154270878;0.074852325;0.003881427;0.023622082;0.000802813;0.000866471;0.004207144;0.216075194;0.112007844;0.012846598;0.000991447;0.000180515;0.016809949;0.605700685;0.037438655;0.006148165;0.000466673;0.000695406;0.009739562;0.000741443;8.97E-05;0.008721638;0.009100156;0.001560908;0.001490156;0.001219747;0.001841126;0.00074517…
49;0.6;85.2;2003.W;0.002472964;0.014832687;0.004147181;0.002917752;0.11090745;0.079713598;0.00434551;0.019469774;0.001467135;0.000630321;0.002574351;0.295506243;0.19068536;0.000591226;0.000297265;0.000707072;0.00964922;0.732230807;0.057966711;0.003400567;0.00018876;0.000295253;0.028769542;0.001369053;0.000104814;0.005426663;0.004076138;0.001776071;0.001196362;0.000555009;0.003496153;0.000155212;0…
50;0.5;88.05;2006.W;0.005258976;0.013276938;0.012679104;0.020350363;0.165891855;0.082102283;0.021075622;0.040165638;0.001939983;0.001158175;0.002604942;0.261087766;0.0947934;0.009464888;0.001178904;0.000239244;0.011593113;0.529983399;0.043878593;0.00364475;0.000200955;0.000582867;0.013318397;0.000599451;0.000204369;0.005721299;0.003303078;0.002770205;0.000857961;0.000541164;0.003059126;0.00095623…
51;0.5;95.65;2006.S;0.002037747;0.02622005;0.001099117;0.002062987;0.10639032;0.045661471;0.001110296;0.02666824;0.001990761;0.000754791;0.003240393;0.210231312;0.139337729;0.000912677;0.000986786;0.00031792;0.015832982;0.408447811;0.041631646;0.003046283;0.000166478;0.000517694;0.003708974;0.0011197;0.000153002;0.007720826;0.005715842;0.001146015;0.000414584;0.000316577;0.003098195;0.000551412;0…
52;2.8;93.2;2006.S;0.003225145;0.016282381;0.000410019;0.001049438;0.128320821;0.057450335;0.00051288;0.027853823;0.00117253;0.001027736;0.002461679;0.310057315;0.119979306;0.002911836;0.0014982;0.000114498;0.015737967;0.389119332;0.034402252;0.005422056;0.00019956;0.000506883;0.00644131;0.000634602;0.000173867;0.00757115;0.007069676;0.001931745;0.000875571;0.000800986;0.002214859;0.000164707;6.5…
53;1.2;73.05;2007.S;0.001570504;0.046093098;0.004252226;0.007346145;0.089690559;0.019676887;0.014559714;0.011624993;0.000579326;0.0004196;0.003104161;0.276729793;0.210423472;0.000284301;0.002010378;0.000433302;0.013095601;0.430252313;0.053504952;0.002269267;0.000409895;0.000363654;0.007886773;0.00174862;0.000306565;0.010342883;0.003518306;0.00070333;0.000589724;0.000421313;0.003285228;0.000374093…
54;1.9;73.85;2007.S;0.003933242;0.012514992;0.012794427;0.036145475;0.11678878;0.043585226;0.007140997;0.015901732;0.000451346;0.000403764;0.00234519;0.1873137;0.070021325;0.002229025;0.000421772;0.000207102;0.012747856;0.577333739;0.042630866;0.003908412;0.000196098;0.000569953;0.01214339;0.000595347;8.93E-05;0.003161994;0.004246006;0.000979642;0.000828972;0.000191019;0.0025995;0.000150915;0.003…
55;2.4;79.6;2006.W;0.000769474;0.008723386;0.010807785;0.057776451;0.10678674;0.049169708;0.009976861;0.03383721;0.001138213;0.000230741;0.000881702;0.27381476;0.061992936;0.001157482;0.00011751;0.000189223;0.01461686;1.213866949;0.030480092;0.003133504;0.000493691;0.000501743;0.026587857;0.000654732;3.80E-05;0.00093641;0.004152843;0.001660735;0.001715589;0.000920701;0.002075901;0.000504168;0.002…
56;2.4;77.4;2006.W;0.000641322;0.005569033;0.002821866;0.025294871;0.089166418;0.050770906;0.003450063;0.018411011;0.001803815;0.000470903;0.001802219;0.192090941;0.047679983;0.000555976;0.00029503;0.000167147;0.008170303;0.566316954;0.018713218;0.001649932;0.000305392;0.00037874;0.003728503;0.000234497;6.24E-05;0.004520018;0.001763909;0.000260128;0.000214047;0.000464086;0.001472935;0.000648892;0…
57;0.4;87.1;2006.W;0.00131057;0.00802961;0.007841231;0.025749129;0.169035918;0.049954988;0.007541409;0.033686069;0.001333182;0.000542628;0.0008916;0.209643279;0.058893024;0.001476303;9.43E-05;0.000154091;0.009779393;0.879288064;0.031594537;0.002633467;0.000370046;0.000320052;0.013073741;0.000490351;6.80E-05;0.002836469;0.003449578;0.001387958;0.000651975;0.000732559;0.001859486;0.000364968;0.0023…
58;0.6;76.3;2006.W;0.003510241;0.016350976;0.012863837;0.061660053;0.149423978;0.182054485;0.012998448;0.034178539;0.001441312;0.000623053;0.002739562;0.513621557;0.197291003;0.002854757;0.000201971;0.00023203;0.013975152;1.382198546;0.041124863;0.0053235;0.000780727;0.000568209;0.027829856;0.000873276;0.000101249;0.003152448;0.005776485;0.003511032;0.00148209;0.001487363;0.002382582;0.000522038;…
59;3.5;86.5;2006.S;0.002948562;0.015706406;0.000384268;0.001531941;0.114630305;0.054772306;0.000468051;0.025833165;0.001239334;0.001127519;0.002296777;0.264577723;0.108744985;0.004907163;0.001386817;0.000166675;0.013051936;0.342086383;0.039049027;0.004958747;0.000181806;0.000525702;0.007913499;0.000632997;0.000242103;0.006449899;0.006117905;0.002165855;0.000891607;0.000759551;0.002395163;0.000130…
60;1.6;88.45;2007.W;0.001209869;0.016588814;0.001252641;0.006387777;0.084210907;0.051628971;0.002240136;0.014848181;0.000975022;0.000861034;0.001793302;0.142982974;0.048944737;0.001133651;0.000472398;0.000254408;0.011466206;0.394502046;0.026125783;0.001892193;0.000133447;0.000398261;0.002173915;0.000639142;9.27E-05;0.00415825;0.003015178;0.000867277;0.000169085;0.000405804;0.00222421;0.001305765;…
61;1;78.25;2007.W;0.002501358;0.015014469;0.000696509;0.007236974;0.12536476;0.053111589;0.001644805;0.014179332;0.001902438;0.000819737;0.002338319;0.200428565;0.070515551;0.008254007;0.000713319;0.000406181;0.015085008;0.495413103;0.043159242;0.002922553;0.000165423;0.000593993;0.002864076;0.000730441;0.000137238;0.004841745;0.004765909;0.001683991;0.000277109;0.000605847;0.002196356;0.00091062…
62;4.3;88.65;2006.S;0.006066639;0.028772886;0.014076954;0.016989032;0.132333652;0.074078265;0.003110386;0.029921309;0.001864412;0.00112336;0.004345588;0.440330077;0.099234054;0.007087772;0.001050987;0.000177087;0.015902685;0.60209662;0.044832753;0.004136098;0.000304418;0.000533748;0.006700126;0.000771221;0.000161934;0.009903545;0.006449762;0.001842563;0.000753128;0.00060793;0.002859795;0.00219145…
63;0.9;86.65;2006.S;0.001082347;0.01305527;0.000658658;0.005103487;0.084806768;0.032940922;0.000981303;0.036139941;0.001095307;0.000840371;0.002847967;0.244294469;0.063493129;0.000510961;0.000620672;0.00023585;0.013273501;0.322087397;0.028315567;0.002161352;0.000109154;0.000326347;0.001540124;0.000428261;9.33E-05;0.005925714;0.003807288;0.000805286;0.000304906;0.000348345;0.002727873;0.000374804;…
64;0.9;81.05;2007.S;0.001869069;0.022763976;0.000491474;0.005033836;0.191290937;0.057243796;0.001263505;0.03285587;0.00109686;0.000784965;0.002763422;0.196556352;0.052086611;0.001967467;0.001004696;0.000224663;0.01309298;0.320548902;0.032032567;0.002581284;0.000172382;0.000399018;0.001724555;0.000522323;0.00013539;0.00858409;0.004086601;0.00109101;0.000245625;0.000661906;0.002452893;0.001133081;0…
65;4.3;88.6;2006.S;0.002108072;0.006353721;0.002214147;0.017112505;0.112679736;0.07512084;0.006115005;0.037335733;0.000973717;0.00086363;0.002384136;0.344535086;0.074937509;0.000645664;0.000139059;0.000151181;0.011818665;0.892661418;0.034329031;0.003780441;0.000370748;0.000404598;0.005417816;0.000432959;8.46E-05;0.002126811;0.004459269;0.002167767;0.001508837;0.000681115;0.002632619;0.000528279;0…
66;0.9;86.05;2007.W;0.000588776;0.017724716;0.000694345;0.005298241;0.089681945;0.029606147;0.001372695;0.016749682;0.001323023;0.000465888;0.001294649;0.180196885;0.155266599;0.00033535;0.000492538;0.000327454;0.011453308;0.423141332;0.02443064;0.001494395;0.000113264;0.000301297;0.002880214;0.00086441;9.38E-05;0.004145584;0.002142887;0.000954725;0.000299323;0.000282543;0.002041287;0.000987425;0…
67;0.9;81.65;2007.S;0.004533199;0.043073047;0.001522438;0.005563615;0.114400983;0.103015445;0.001447985;0.020188709;0.001942126;0.00114831;0.004730837;0.361233313;0.206354866;0.010928147;0.001763788;0.000215855;0.015646408;0.474539697;0.051955563;0.005122668;0.000160433;0.000587524;0.01279087;0.001081949;0.000229711;0.009624073;0.008092619;0.003011275;0.000706147;0.000481298;0.002221644;0.0013580…
68;1;85.65;2006.S;0.001559753;0.023592357;0.001297877;0.003283565;0.121095043;0.07682052;0.002510573;0.028258591;0.001192749;0.000747041;0.001745389;0.260198045;0.103609928;0.000500003;0.00066833;0.000268375;0.013424298;0.486645079;0.036006027;0.002599588;0.000224041;0.000310338;0.00308987;0.000697965;9.36E-05;0.005766841;0.004950716;0.000946425;0.000399481;0.000558325;0.002301717;0.00108098;0.00…
69;1.5;89.8;2006.S;0.005388163;0.01444428;0.002268366;0.013030346;0.106097055;0.054270565;0.004341451;0.013695528;0.000817185;0.001371684;0.003549352;0.237495904;0.057328294;0.018854559;0.000538492;0.000158503;0.014532633;0.576450461;0.043724919;0.003697801;0.000286303;0.000696995;0.002721325;0.000492568;9.95E-05;0.006483169;0.006651108;0.001738027;0.000610133;0.000819284;0.001805815;0.000903784;…
70;2.1;91.45;2007.W;0.002389016;0.030945094;0.00014871;0.002425604;0.131917475;0.051697503;0.000402869;0.022298913;0.001451742;0.00102306;0.001985679;0.266339763;0.095703358;0.001724566;0.000945193;0.000200766;0.019584066;0.308131804;0.039836561;0.004978093;0.000170744;0.000523491;0.002174412;0.000558907;0.000108357;0.00529679;0.008254605;0.002022196;0.000424985;0.000608395;0.002177857;0.00052946…
71;1;93.05;2007.W;0.003629568;0.034074258;0.000417342;0.003727437;0.155578779;0.072995238;0.000756383;0.021713554;0.001199893;0.001127279;0.003154729;0.329649631;0.141361167;0.003459572;0.001532773;0.000206698;0.01867555;0.312944861;0.030791754;0.006678294;0.000194719;0.00050897;0.003418028;0.000631052;0.000249006;0.006535521;0.009012625;0.002601688;0.000794932;0.000832652;0.002005202;0.000480923…
72;0.9;80.65;2006.S;0.000171188;0.00624292;0.000121411;0.001543543;0.039786603;0.012042663;0.000652795;0.017602713;0.000617948;0.000242879;0.001113674;0.084918386;0.039380948;4.80E-05;0.000262256;0.000135906;0.004929695;0.188115033;0.013742816;0.000821011;9.21E-05;0.000207575;0.00108194;0.000228545;5.94E-05;0.002787796;0.001996121;0.000101399;0.000143073;0.000160858;0.000910853;0.000179173;7.49E-…
73;3.7;83.2;2006.S;0.004236329;0.017373092;0.002887816;0.008766069;0.079713586;0.057810824;0.005297944;0.020133706;0.000823395;0.000594614;0.003264756;0.256133694;0.082737548;0.003637956;0.000416257;0.000173798;0.010453485;0.696727151;0.038765469;0.003796466;0.000421889;0.000441737;0.005571727;0.000648256;7.21E-05;0.004559661;0.006669229;0.001494448;0.000998802;0.000535072;0.002689744;0.000588446…
74;2.7;86.25;2007.W;0.001281377;0.021803108;0.010679105;0.000304335;0.16133527;0.04483428;0.00609427;0.015569442;0.001026797;0.000788552;0.002202928;0.128479122;0.058726529;0.00287599;0.000512466;0.000221722;0.012418987;0.386883874;0.039705026;0.005623531;0.00052659;0.000627324;0.224790135;0.000558302;8.69E-05;0.004909771;0.009357894;0.00216552;0.000858107;0.000548176;0.002514262;0.003393253;0.00…
75;2.4;80.1;2007.W;0.003648542;0.016106435;0.002719051;0.015165336;0.10072778;0.044823951;0.004346204;0.010177531;0.000597295;0.000984707;0.002026133;0.350617529;0.113953343;0.008422905;0.000268122;0.000136734;0.014878134;0.720931045;0.043974998;0.00573606;0.000134764;0.000591668;0.014361815;0.000721931;0.000115551;0.004993717;0.009427587;0.002884911;0.000638372;0.000418641;0.001507958;0.00182789…
76;1.6;98.2;2006.S;0.003901333;0.03612252;0.000797644;0.013034652;0.130796486;0.04293875;0.00340239;0.024600264;0.001687848;0.000423337;0.00231186;0.30538377;0.16379416;0.010284531;0.000455821;0.000215598;0.014558376;0.776895701;0.034286683;0.00527469;0.000181543;0.000594663;0.047641174;0.001427716;9.88E-05;0.005427411;0.007042961;0.003970884;0.001700947;0.00060488;0.002940435;0.000219004;0.00036…
77;0.5;81.85;2007.W;0.005257465;0.033240816;0.000918477;0.001160005;0.106954765;0.033390518;0.000610066;0.038044026;0.000813372;0.001655416;0.004215052;0.189768894;0.056917929;0.029380591;0.001305942;0.000218776;0.013244808;0.282513992;0.055182021;0.003995314;0.000314862;0.000758355;0.004892891;0.000797616;0.000155494;0.009133524;0.00533845;0.002303479;0.000520724;0.001112737;0.002341725;0.000697…
78;2.5;91.05;2007.W;0.005528828;0.030009869;0.001667888;0.004005609;0.231637666;0.096414863;0.001940484;0.019346893;0.000568716;0.001526128;0.003451259;0.307470065;0.078553433;0.021740535;0.001048943;0.000218562;0.015396699;0.440264823;0.041774497;0.005118701;0.000256848;0.000736314;0.003138209;0.000809591;0.00023631;0.007980441;0.010030504;0.002572282;0.000496201;0.000711973;0.002337149;0.001531…
79;1;89.45;2007.W;0.004548436;0.0496542;0.002498615;0.019050223;0.116078739;0.067530838;0.002988005;0.02181499;0.000766993;0.001396662;0.003725065;0.262464736;0.07076663;0.012065758;0.00159412;0.000198036;0.014374881;0.365330126;0.043969604;0.004234796;0.00027436;0.000883502;0.004285679;0.000680551;0.000227525;0.008960655;0.00979022;0.001450435;0.000364271;0.001023428;0.003558727;0.001093102;0.00…
80;5.3;87.05;2007.W;0.000315488;0.057083806;0.002667168;0.006678389;0.132498256;0.011832021;0.002227416;0.012239664;0.001867413;0.000328465;0.002038212;0.152523027;0.309613852;0.000350102;0.001146172;0.000573987;0.013739949;0.306655847;0.038771236;0.002470851;6.52E-05;0.000161678;0.005930703;0.00269684;0.000119606;0.005958199;0.004495734;0.001782967;0.000420724;0.000126518;0.001984251;0.000339284…
81;0.4;92.1;2006.W;0.003982961;0.033186202;0.003331949;0.024343731;0.139833579;0.08502094;0.011994121;0.021370012;0.001074059;0.000342544;0.002120334;0.215292138;0.163245361;0.003387067;0.000585859;0.000292229;0.016688938;0.851130333;0.030214049;0.00458165;0.00065434;0.000415982;0.021233647;0.001389233;8.64E-05;0.004178878;0.007565063;0.001454032;0.001008573;0.001154942;0.001686308;0.000198793;0.…
82;3.1;95.85;2006.W;0.007709543;0.022022909;0.002535692;0.004629788;0.138920274;0.110207182;0.002013535;0.035952595;0.000572357;0.001168221;0.00389902;0.281423337;0.081892276;0.013234986;0.001253933;0.000143832;0.017834583;0.528112657;0.042421685;0.005853456;0.000334326;0.00077186;0.004603986;0.000540467;0.000145753;0.009586724;0.01040819;0.002339735;0.000610736;0.000995842;0.002179975;0.00097395…
83;0.9;94.5;2007.W;0.002504069;0.026465409;0.000365429;0.005874774;0.137285347;0.052461663;0.001222472;0.030828966;0.000885689;0.000995729;0.002005065;0.351454459;0.168337733;0.006480442;0.000619684;0.000200697;0.011871049;0.405880918;0.044915283;0.006643564;0.000350995;0.000424654;0.006215034;0.00090895;0.000143142;0.004653012;0.011727182;0.003049813;0.000778929;0.001161833;0.003511692;0.0005919…
84;0.9;80.8;2006.S;0.005805821;0.015703325;0.008052105;0.052160829;0.104323922;0.123582261;0.012351817;0.017892672;0.000748486;0.000501141;0.001268569;0.332362382;0.115005038;0.023366067;0.000136201;0.000149102;0.014077816;1.258859838;0.051713026;0.00651632;0.000525206;0.000541579;0.041221816;0.000896596;7.81E-05;0.002220592;0.010402147;0.003246252;0.001720997;0.0012077;0.001722141;0.000166964;0.…
85;0.4;80;2006.W;0.006717762;0.011486026;0.012247621;0.062220917;0.09163511;0.090824264;0.01124469;0.023802802;0.000666999;0.000539741;0.002195381;0.341388136;0.057800795;0.00589031;0.000253996;0.000177225;0.016693123;1.140910939;0.04311897;0.005633711;0.000643057;0.000703954;0.012586067;0.000338574;8.24E-05;0.004269028;0.010977253;0.002437944;0.00288634;0.001285854;0.001823629;5.62E-05;0.0033667…
86;2.2;87.45;2006.W;0.004149837;0.017092414;0.001531871;0.012421564;0.103106912;0.064007047;0.002923795;0.02807721;0.000690738;0.000798903;0.00184546;0.172481341;0.067471317;0.004002847;0.000496221;0.00011958;0.013089648;0.359972701;0.03513163;0.003307401;0.000280543;0.0006108;0.002538326;0.000445537;8.60E-05;0.004911414;0.005799492;0.001144477;0.000148065;0.000639821;0.001756127;0.00168018;0.000…
87;2.3;83.1;2005.W;0.010315445;0.018178642;0.007006204;0.01640145;0.078970742;0.061039701;0.005510395;0.021528532;0.000762895;0.000847306;0.00144401;0.322085498;0.129390205;0.030595879;0.000333752;0.000107286;0.015624799;0.912085952;0.046359313;0.006171332;0.000408784;0.000886194;0.008800404;0.000624042;7.89E-05;0.004334374;0.009395394;0.002243622;0.001984672;0.000576003;0.002601819;0.00027542;0.…
88;0.5;86.3;2006.W;0.006789509;0.007986681;0.015391718;0.067937433;0.110131775;0.0542652;0.01920716;0.025334354;0.000421975;0.000259944;0.000779279;0.255341471;0.085269559;0.004296238;0.000103964;0.000194431;0.01566501;1.404886394;0.043054132;0.005227528;0.000951934;0.000593827;0.05738316;0.000471859;6.02E-05;0.001368965;0.010136502;0.002730886;0.001711122;0.001183019;0.00075267;7.55E-05;0.005098…
89;2.4;82.4;2005.W;0.001026562;0.01618802;0.000921978;0.001967452;0.074399147;0.024155682;0.001923509;0.02263953;0.000735104;0.000562642;0.002891085;0.193976167;0.122520922;0.000538083;0.000363413;0.000227099;0.011322828;0.372841248;0.029130428;0.001962209;0.000297463;0.000286426;0.008584217;0.000574507;0.000110801;0.007691922;0.003597982;0.001143771;0.000288909;0.000529253;0.001856389;0.00100249…
90;2.4;92.6;2005.S;0.002019674;0.015466941;0.000987974;0.000290629;0.122970959;0.114244431;0.001890139;0.027273022;0.001261175;0.000623812;0.001392967;0.222450318;0.107158824;0.000749603;0.00067455;0.000208561;0.016285278;0.566978325;0.024158209;0.003776542;0.000480017;0.000656078;0.002184745;0.00048446;0.000103345;0.006143857;0.004317351;0.001351203;0.000294604;0.000986923;0.003155849;0.00123470…
91;0.6;87.2;2006.W;0.007482816;0.008677341;0.004168865;0.032043285;0.103186126;0.055308394;0.012312681;0.013317726;0.000545893;0.000369537;0.001251668;0.272590757;0.066329745;0.006804443;6.75E-05;0.000243624;0.014617405;1.349396964;0.042234022;0.005149524;0.000546923;0.00044972;0.054584836;0.00046428;6.56E-05;0.002756152;0.008736566;0.002989927;0.001641179;0.000624234;0.000843418;0.000149401;0.00…
92;3.1;97.3;2006.S;0.005275116;0.014192709;0.043476423;0.157650384;0.109449443;0.075961159;0.034359077;0.023692293;0.000719483;0.000312829;0.000704306;0.25698279;0.081355219;0.00766812;8.55E-05;0.000147473;0.009180969;1.434135663;0.034006185;0.005933716;0.001753511;0.000709684;0.069667642;0.000502928;5.42E-05;0.000884801;0.008164678;0.002285591;0.0018929;0.00136229;0.002474526;0.000119047;0.02009…
93;0.9;100.5;2005.S;0.003019066;0.009347707;0.003137951;0.020471765;0.101334726;0.080531958;0.010520644;0.036902396;0.001238541;0.000773289;0.001900212;0.293251012;0.110844258;0.002498052;0.00024825;9.07E-05;0.011450781;1.091845714;0.032758706;0.00365021;0.000634072;0.000648524;0.004469966;0.000373564;7.30E-05;0.00294214;0.004824871;0.002732398;0.001226433;0.001115022;0.001582683;0.000849761;0.00…
94;3;88.85;2005.S;0.001666968;0.029366072;0.003347106;0.006974604;0.156163696;0.063004455;0.00368593;0.042475205;0.005193062;0.000956436;0.004410422;0.35311023;0.230218762;0.000375327;0.00138159;0.000674294;0.028469627;0.710250077;0.042918273;0.004300078;0.000898843;0.001254756;0.008093465;0.00066394;0.00022169;0.010887811;0.007992515;0.000907255;0.000601287;0.002880955;0.004750915;0.007707552;0.…
95;2.7;85.2;2006.W;0.009066689;0.012572032;0.016890897;0.124154392;0.09319391;0.106036302;0.007147329;0.017143038;0.000832803;0.0005162;0.003815409;0.21001239;0.070166366;0.012618787;0.000528067;0.000173016;0.012525412;1.09320621;0.040912115;0.004942471;0.000393499;0.000623713;0.002389949;0.000645785;9.94E-05;0.008226484;0.00735378;0.001901991;0.001499711;0.000854163;0.001889865;0.000169843;0.003…
96;0.6;84.6;2006.W;0.009558375;0.027157307;0.000187551;0.001531125;0.123535687;0.068346852;0.00062157;0.029769794;0.000838463;0.00117179;0.00248625;0.3919383;0.107109018;0.0359165;0.001115249;0.000157225;0.016181016;0.443655007;0.051960835;0.008454791;0.000194337;0.000583513;0.005207481;0.000642942;0.000164497;0.005953079;0.021509061;0.003675854;0.001960924;0.000727448;0.002283186;0.000233411;9.4…
97;3.6;81.05;2005.S;0.00532005;0.015977914;0.002588911;0.013580639;0.060530842;0.130698109;0.005388258;0.025540593;0.002393202;0.001001065;0.003639232;0.404734417;0.176867055;0.00415022;0.000951372;0.000167804;0.010705435;0.730012704;0.03155444;0.002812345;0.000871191;0.001210401;0.011927801;0.000432595;0.00015196;0.00783391;0.005936293;0.001415895;0.000549986;0.001781032;0.002239579;0.001766821;…

## Sheet: Table S2
Metabolite;KEGG-ID
NADH;C00004
Phosphoric acid;C00009
Adenosine 3'	5'-cyclic monophosphate (cAMP);C00020
Adenosine-5-monophosphate;C00020
Pyruvic acid;C00022
Glutamic acid;C00025
2-Ketoglutaric Acid;C00026
UDP-glucose;C00029
Glucose;C00031
5'-guanylate diphosphate (guanosine diphosphate);C00035
Glycine;C00037
Alanine;C00041
Succinic acid;C00042
Lysine;C00047
Aspartic acid;C00049
Serine;C00065
Methionine;C00073
phosphoenol pyruvate;C00074
Uridine triphosphate (UTP);C00075
Tryptophan;C00078
Phenylalanine;C00079
Tyrosine;C00082
Fructose-6-phosphate;C00085
Urea;C00086
Glycerol-3-phosphate;C00093
Glyceryl phosphate;C00093
Fructose;C00095
GDP-D-mannose;C00096
beta-Alanine;C00099
Uracil;C00106
dihydroxyacetone phosphate (DHAP);C00111
Ribose-5-phosphate;C00117
Fumaric acid;C00122
Leucine;C00123
Glutathione	oxidized;C00127
Inosine 5'-monophosphate (IMP);C00130
myo-Inositol;C00137
Guanosine-5-monophosphate;C00144
Proline;C00148
Malic acid;C00149
Citric acid;C00158
Acetoacetic acid;C00164
Acetoacetic acid;C00164
Uridine diphosphate glucuronic acid;C00167
Hydroxypyruvic acid;C00168
5'-Methylthioadenosine;C00170
Agmatine [-NH3];C00179
Benzoic acid;C00180
Glycogen;C00182
Valine;C00183
Dihydroxyacetone (glycerone);C00184
Lactic acid;C00186
Cholesterol;C00187
Threonine;C00188
Ceramide (d18:1/20:0);C00195
Ceramide (d18:1/24:1(15Z));C00195
D-Glycerate 3-phosphate;C00197
UDP-N-acetyl-D-galactosamine;C00203
Maltose;C00208
Oxalic Acid;C00209
Taurine;C00245
Gluconic acid;C00257
Hypoxanthine;C00262
Homoserine;C00263
N-Acetyl-b-neuraminic acid;C00270
Mannose-6-phosphate;C00275
D-Sedoheptulose 7-phosphate;C00281
Inosine;C00294
Creatine;C00300
Isocitric acid;C00311
6-Phosphogluconic acid;C00345
Ethanolaminephosphate;C00346
Guanosine;C00387
Mannitol;C00392
Isoleucine;C00407
Dipalmitoylphosphatidic acid;C00416
Dehydroascorbic acid;C00425
Sedoheptulose 1	7-bisphosphate;C00447
Methylglyoxal;C00546
D-Ribose 1-phosphate;C00620
D-Glucose 1	6-biphosphate;C00660
Diaminopimelic acid;C00666
3-Methyl-2-oxovaleric acid;C00671
Diacetyl;C00741
Creatinine;C00791
Chlorogenic acid;C00852
D-Pantothenic acid;C00864
Galactonic acid;C00880
Homocarnosine;C00884
Cyclic CMP;C00941
3-Dehydroquinic acid;C00944
L-2-Aminoadipic acid;C00956
O-Acetylserine;C00979
Phosphoglycolic acid;C00988
Dimethylglycine;C01026
S-Acetyldihydrolipoamide;C01136
myo-Inositol-1-phosphate;C01177
Glucosylceramide (d18:1/24:1(15Z));C01190
Glycerylphosphorylethanolamine;C01233
D-Glucono-1	5-lactone 6-phosphate;C01236
Xylose;C01394
Allose;C01487
Mannose;C01487
Octadecanoic acid;C01530
Allantoin;C01551
Maltotriose;C01835
FMNH;C01847
Pyroglutamic acid;C01879
Pseudouridine;C02067
Glutaconic acid;C02214
2-Hydroxyadipic acid;C02360
alpha-Tocopherol;C02477
1-Methyladenosine;C02494
N1-(5-Phospho-D-ribosyl)-AMP;C02741
(S)-2-Hydroxyglutarate;C03196
3-Demethylubiquinone-9;C03226
Glucose-6-phosphate;C03251
N2-Succinyl-L-ornithine;C03415
beta-1-O-methyl-Galactopyranoside;C03619
Inositol cyclic phosphate;C04299
Ganglioside GM3 (d18:1/18:0);C04730
Ganglioside GM3 (d18:1/20:0);C04730
Ganglioside GM3 (d18:1/22:0);C04730
Ganglioside GM3 (d18:1/24:1(15Z));C04730
2-Hydroxyethanesulfonate;C05123
Homoisocitrate;C05662
Tetradecanoic acid;C06424
Traumatic acid;C16308

## Sheet: Table S3
protein;ensembl_gene_id;external_gene_id;wikigene_description;refseq_peptide;ensembl_peptide_id;;entrezgene
ACADL;ENSSSCG00000016156;ACADL;acyl-CoA dehydrogenase	long chain;NP_999062;ENSSSCP00000017114;;396931
ACSL3;ENSSSCG00000016223;ACSL3;acyl-CoA synthetase long-chain family member 3;NP_001137170;ENSSSCP00000017187;;100233169
Actin..alpha.skel..Muscle.;ENSSSCG00000010190;ACTA1;actin	alpha 1	skeletal muscle;NP_001161267;ENSSSCP00000010867;;100154254
adenylate.kinase.isoenzyme.1..Pr..;ENSSSCG00000005627;AK1;adenylate kinase isoenzyme 1-like;XP_003122225;ENSSSCP00000006028;;100521423
AMBP;ENSSSCG00000005485;AMBP;alpha-1-microglobulin/bikunin precursor;;ENSSSCP00000029018;;397593
Creatine.kinase.M.type;ENSSSCG00000025268;CKM;creatine kinase	muscle;NP_001123421;ENSSSCP00000021419;;397264
Desmin;ENSSSCG00000020785;DES;desmin;NP_001001535;ENSSSCP00000021504;;396725
Elongation.factor.1.alpha.1;ENSSSCG00000004489;EF1ALPHA;elongation factor 1-alpha 1-like;NP_001090887;ENSSSCP00000004843;;574059
Elongation.factor.1.alpha.1;ENSSSCG00000004489;EF1ALPHA;elongation factor 1-alpha 1-like;NP_001090887;ENSSSCP00000004843;;100625358
ETFDH;ENSSSCG00000008877;ETFDH;electron transfer flavoprotein-ubiquinone oxidoreductase	mitochondrial-like;;ENSSSCP00000009469;;100515785
Fructose.1.6.bisphosphatase.isoenzyme.2;ENSSSCG00000010947;FBP2;fructose-1	6-bisphosphatase 2;NP_001161104;ENSSSCP00000011674;;100134828
Four.and.a.half.LIM.domains.1.protein..isof..C;ENSSSCG00000012699;FHL1C;four and a half LIM domains 1 protein	isoform C;NP_999540;ENSSSCP00000013501;;397667
GAPDH;ENSSSCG00000000694;GAPDH;glyceraldehyde-3-phosphate dehydrogenase;NP_001193288;ENSSSCP00000000740;;396823
Heat.shock.protein.beta.1;ENSSSCG00000024482;HSPB1;heat shock protein beta-1-like;NP_001007519;ENSSSCP00000008215;;493184
Heat.shock.protein.beta.1;ENSSSCG00000024482;HSPB1;heat shock protein beta-1-like;NP_001007519;ENSSSCP00000008215;;100624812
Myosin.light.chain.2V;ENSSSCG00000009830;MLC-2V;myosin light chain 2V;NP_998956;ENSSSCP00000010494;;396690
MSTN;ENSSSCG00000016047;MSTN;myostatin;NP_999600;ENSSSCP00000017001;;399534
Myosin.binding.protein.C..slow.type..pred..;ENSSSCG00000000866;MYBPC1;myosin binding protein C	slow type;XP_003126724;ENSSSCP00000000925;;100523187
MYF6;ENSSSCG00000026533;MYF6;myogenic factor 6 (herculin);;ENSSSCP00000001001;;397005
Myosin.3..pred..;ENSSSCG00000018007;MYH3;myosin heavy chain;XP_003132042;ENSSSCP00000019082;;396711
Myosin.7;ENSSSCG00000002029;MYH7;myosin	heavy chain 7	cardiac muscle	beta;NP_999020;ENSSSCP00000002219;;396860
Myosin.light.chain.3.like;ENSSSCG00000011325;MYL3;myosin	light chain 3	alkali;XP_003132211;ENSSSCP00000012076;;100515755
Phosphoglycerate.mutase.2;ENSSSCG00000016720;PGAM2;phosphoglycerate mutase 2 (muscle);NP_001128440;ENSSSCP00000017710;;100188980
Pyruvate.kinase.isozymes.M1.M2;ENSSSCG00000001930;PKM;pyruvate kinase	muscle;XP_003356731;ENSSSCP00000002108;;100158154
PPP3C;ENSSSCG00000010301;PPP3CB;protein phosphatase 3	catalytic subunit	beta isozyme;;ENSSSCP00000010982;;396603
Glycogen.phosphorylase..muscle.1.;ENSSSCG00000013022;PYGM;phosphorylase	glycogen	muscle;XP_003122636;ENSSSCP00000013848;;733659
SLC37A4;ENSSSCG00000015105;SLC37A4;solute carrier family 37 (glucose-6-phosphate transporter)	member 4;;ENSSSCP00000028069;;100516688
Tropomodulin.4;ENSSSCG00000006631;TMOD4;tropomodulin 4 (muscle);NP_001230223;ENSSSCP00000007072;;100151861
Troponin.C..skel..muscle;ENSSSCG00000007424;TNNC2;troponin C type 2 (fast);NP_001001862;ENSSSCP00000007911;;414905
Troponin.I..slow.skel..Muscle;ENSSSCG00000024061;TNNI1;troponin I type 1 (skeletal	slow);NP_999077;ENSSSCP00000021295;;396947
Troponin.T..slow.skel..Muscle;ENSSSCG00000025353;TNNT1;troponin T type 1 (skeletal	slow);NP_998913;ENSSSCP00000026745;;396579
TPI1;ENSSSCG00000000685;TPI1;triosephosphate isomerase 1;NP_001032228;ENSSSCP00000000730;;100157582
Tropomyosin.beta.chain;ENSSSCG00000005316;TPM2;tropomyosin 2 (beta);NP_001123419;ENSSSCP00000005709;;396693
TRIB3;ENSSSCG00000007208;TRIB3;tribbles homolog 3 (Drosophila);;ENSSSCP00000007676;;100518810
Tropomyosin.alpha.1.chain;ENSSSCG00000004570;;tropomyosin 1 (alpha);NP_001090952;ENSSSCP00000004929;;100037999
